# Supplementary material for: General synthesis of hollow MnO2, Mn3O4and MnO nanospheres as superior anode materials for lithium ion batteries
Source: Royal Society of Chemistry journal article supplement (doi:10.1039/c4ta03924f), 2014-08-27
Supplement: c4ta03924f1.pdf [file c4ta03924f1.pdf]

## Supporting information

# General Synthesis of Hollow $\text{MnO}_2$ , $\text{Mn}_3\text{O}_4$ , and $\text{MnO}$ Nanospheres as Superior Anode Materials for Lithium Ion Batteries

Jie Yue,<sup>a</sup> Xin Gu,<sup>a</sup> Liang Chen,<sup>a</sup> Nana Wang,<sup>a</sup> Xiaolei Jiang,<sup>a</sup> Huayun Xu,<sup>a</sup> Jian Yang<sup>\*a</sup> and Yitai Qian<sup>\*ab</sup>

<sup>a</sup> Key Laboratory of Colloid and Interface Chemistry, Ministry of Education. School of Chemistry and Chemical Engineering, Shandong University, Jinan, 250100, P.R. China; E-mail: yangjian@sdu.edu.cn

<sup>b</sup> Hefei National Laboratory for Physical Science at Microscale, Department of Chemistry, University of Science and Technology of China, Hefei, 230026, P.R. China. E-mail: ytqian@ustc.edu.cn

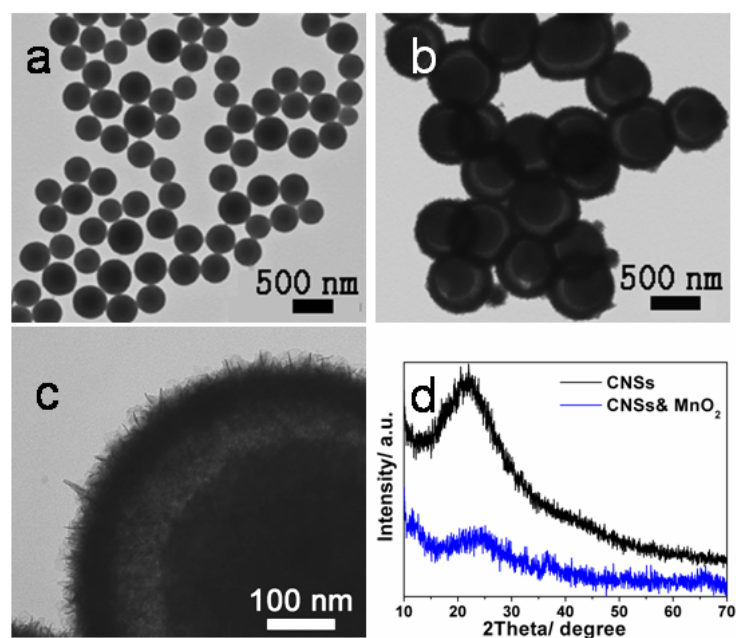

**Fig. S1** TEM images of (a) carbon nanospheres and (b,c) CNSs@MnO<sub>2</sub> spheres. (d) XRD patterns of carbon nanospheres and CNSs@MnO<sub>2</sub> spheres.

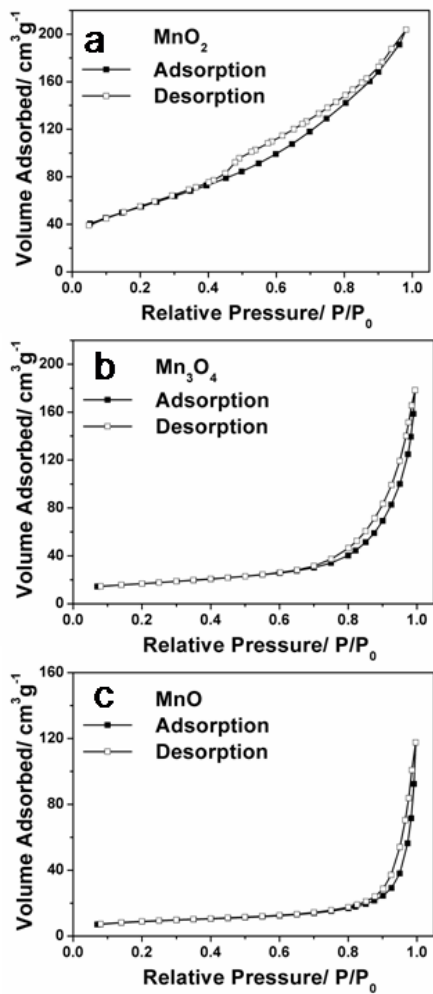

5 **Fig. S2** Nitrogen adsorption-desorption isotherms of (a) MnO<sub>2</sub>, (b) Mn<sub>3</sub>O<sub>4</sub> and (c) MnO hollow spheres.

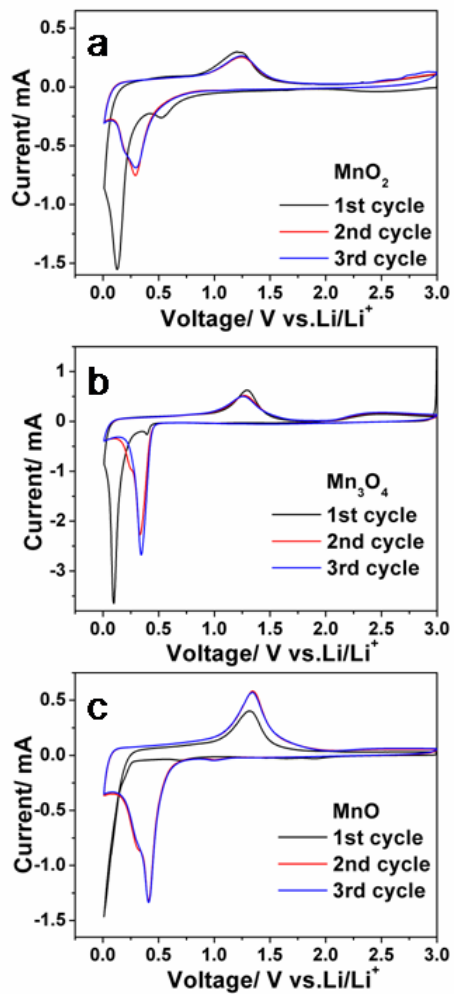

5 **Fig. S3** Cyclic voltammograms (CVs) of (a) MnO<sub>2</sub>, (b) Mn<sub>3</sub>O<sub>4</sub> and (c) MnO hollow nanospheres at a scanning rate of 0.1 mV s<sup>-1</sup>.

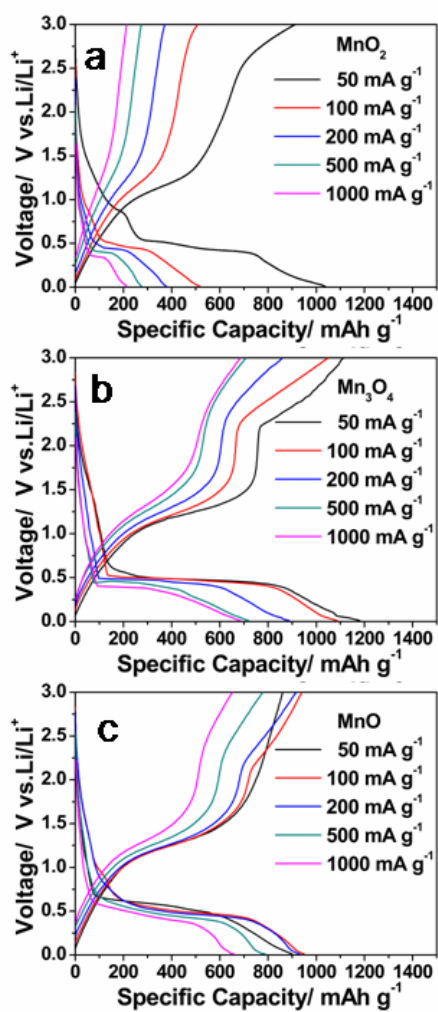

**Fig. S4** First Discharge-charge curves of (a) MnO<sub>2</sub>, (b) Mn<sub>3</sub>O<sub>4</sub> and (c) MnO hollow nanospheres at various current densities.

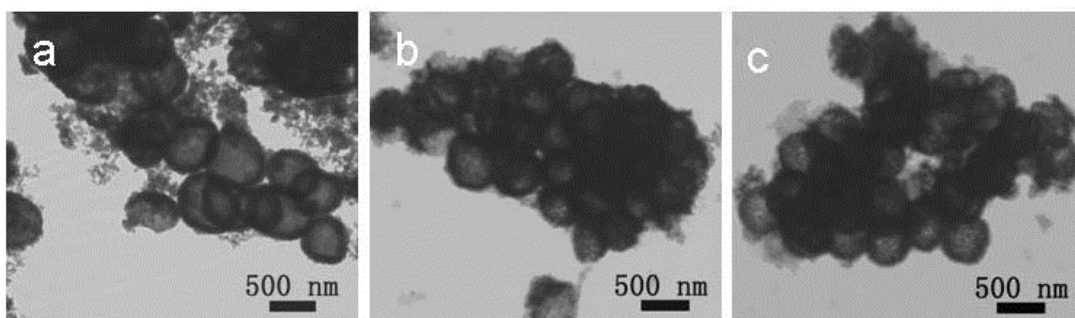

**Fig. S5** TEM images of the electrodes made of (a) MnO<sub>2</sub>, (b) Mn<sub>3</sub>O<sub>4</sub> and (c) MnO after 20 cycles at 100 mA g<sup>-1</sup>.
